# Supplementary material
Source: publisher figshare collection journal article supplement (https://acs.figshare.com/ndownloader/files/6902297)
Supplement: Supplementary file 1 [file 6902297]

**Supporting information for:**

**Energetic and Dynamic Analysis of Transport of Na<sup>+</sup>  
and K<sup>+</sup> through a Cyclic Peptide Nanotube in Water  
and in Lipid Bilayers**

Yeonho Song,<sup>†</sup> Ji Hye Lee,<sup>†</sup> Hoon Hwang,<sup>†</sup> George C. Schatz,<sup>‡</sup> and Hyonseok  
Hwang<sup>\*,†</sup>

*Department of Chemistry and Institute for Molecular Science and Fusion Technology, Kangwon  
National University, Chuncheon, Gangwon-do 24341, Republic of Korea, and Department of  
Chemistry, Northwestern University, 2145 Sheridan Rd., Evanston, IL 60208*

E-mail: hhwang@kangwon.ac.kr

---

<sup>\*</sup>To whom correspondence should be addressed

<sup>†</sup>Department of Chemistry and Institute for Molecular Science and Fusion Technology, Kangwon National University, Chuncheon, Gangwon-do 24341, Republic of Korea

<sup>‡</sup>Department of Chemistry, Northwestern University, 2145 Sheridan Rd., Evanston, IL 60208

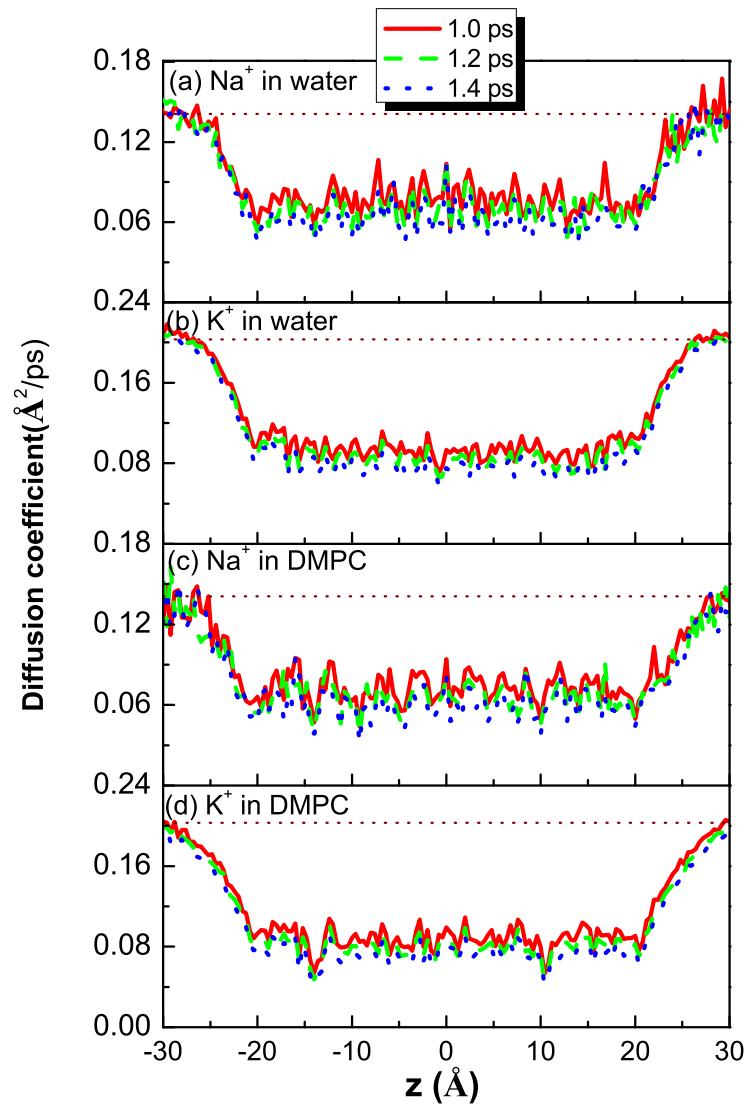

Figure S1: Position-dependent diffusion coefficients of  $\text{Na}^+$  and  $\text{K}^+$  through the CPN in water and DMPC bilayers with different observation times  $\Delta t$ .
